# Supplementary material for: Synthesising practice guidelines for the development of community-based exercise programmes after stroke
Source: PubMed Central journal article supplement (PMC3851241; doi:10.1186/1748-5908-8-115), 2013-10-01
Supplement: 1748-5908-8-115-S1.pdf [file 1748-5908-8-115-S1.pdf]

## Additional File 1

### Guideline search strategies

#### Medline & Cinahl

- ("stroke"[MeSH Terms] OR "stroke"[All Fields])
- AND ("exercise"[MeSH Terms] OR " exercise "[All Fields] OR "rehabilitation"[MeSH Terms] OR " rehabilitation "[All Fields])
- AND "Practice Guideline"[Publication Type]

#### limits

- 2000 – June 2012
- English language

#### Guidelines.gov

Keyword: stroke

Guideline Category: Rehabilitation

Publication Year: 2000-2012

#### Google Scholar

All words in title: practice guideline/s, stroke

Publication year: 2000-2012
