# Supplementary material for: Synthesising practice guidelines for the development of community-based exercise programmes after stroke
Source: PubMed Central journal article supplement (PMC3851241; doi:10.1186/1748-5908-8-115), 2013-10-01
Supplement: 1748-5908-8-115-S2.pdf [file 1748-5908-8-115-S2.pdf]

**Additional File 2: Programme proximal objectives and strategies, with guideline page/section references**

|          |                                                                        | [1]   | [2]     | [3]   | [4] | [5] | [6]             | [7]  | [8]  | [9]   | [10] | [11] | [12]              | [13] | [14]    | [15] | [16]         | [17]  | [18]   | [19] |
|----------|------------------------------------------------------------------------|-------|---------|-------|-----|-----|-----------------|------|------|-------|------|------|-------------------|------|---------|------|--------------|-------|--------|------|
|          | <b>Objective &amp; Strategy</b>                                        | Au    | Ca1     | Ca2   | Ca3 | Ca4 | Ca5             | Eu   | Ne   | NZ    | SA   | Si   | UK1               | UK2  | UK3     | US1  | US2          | US3   | US4    | US5  |
| <b>1</b> | <b>Increase muscle strength</b>                                        | 6.2.2 |         | T,p17 |     | P20 |                 |      | E6.4 | 6.2.2 |      |      | 6.19C             |      | 3.6.2.3 | p121 | T1,<br>p2036 |       | 13.1.5 |      |
| 1a       | Lower limb strengthening                                               |       |         | T,p17 |     | p11 | 9.5.3           |      | E6.4 |       |      |      |                   |      | T2,p47  |      | T1,<br>p2036 | p2412 | 13.1.5 |      |
| 1b       | Upper limb strengthening                                               |       | 5.4.1   | T,p17 |     | p11 | 10.2.4          |      | E6.4 |       |      |      | 6.5.1C            |      | T2,p47  |      | T1,<br>p2036 | p2412 | 13.6   |      |
| 1c       | Trunk and core muscle strengthening                                    |       |         | T,p17 |     |     |                 |      |      |       |      |      |                   |      | T2,p47  |      | T1,<br>p2036 |       |        |      |
| <b>2</b> | <b>Increase aerobic endurance</b>                                      |       | 5.4.3   | T,p17 |     | p20 | 9.6;<br>9.10.16 | p103 | E6.4 | 7.8   |      |      | 6.4.1A            |      | 3.6     | p121 | T1,<br>p2036 |       | 13.7   |      |
| 2a       | Treadmill training                                                     |       | 5.5.3   | T,p17 |     | p34 |                 |      | E8.4 |       |      |      |                   |      |         |      | T1,<br>p2036 |       | 13.5   |      |
| 2b       | Use of static bicycle                                                  |       |         | T,p17 |     |     |                 |      |      |       |      |      |                   |      | T2,p47  |      | T1,<br>p2036 |       |        |      |
| 2c       | Other large muscle group aerobic activity                              |       |         | T,p17 |     |     |                 |      |      |       |      |      |                   |      | T2,p47  |      |              |       |        |      |
| <b>3</b> | <b>Regain and maintain normal joint range of movement</b>              |       |         | T,p18 |     |     |                 |      |      |       |      |      | 6.14.1B           |      | 3.6     |      | T1,<br>p2036 |       | 13.2   |      |
| 3a       | Lower limb stretching                                                  |       | 5.5.2   | T,p18 |     |     |                 |      |      |       |      |      |                   |      | T2,p47  |      |              |       |        |      |
| 3b       | Upper limb stretching                                                  |       | 5.4.1   | T,p18 |     |     | 10.11.1<br>9    |      | F3.3 |       |      |      |                   |      |         |      |              |       |        |      |
| 3c       | Trunk stretching                                                       |       |         | T,p18 |     |     |                 |      |      |       |      |      |                   |      | T2p48   |      |              |       |        |      |
| 3d       | Lower limb movement through range                                      |       | 5.5.2   |       |     |     |                 |      |      |       |      |      |                   |      | T2,p47  |      |              |       |        |      |
| 3e       | Upper limb movement through range                                      |       | 5.4.3.1 |       |     | p50 |                 |      |      |       |      |      |                   |      | T2,p47  |      |              |       |        |      |
| 3f       | Unspecified stretch/range of movement exercises                        |       |         | T,p18 |     | p40 |                 |      |      |       |      |      | 6.14.1B<br>; 6.20 |      |         |      | T1,<br>p2036 |       |        |      |
| <b>4</b> | <b>Enhance sensorimotor functions required for functional activity</b> |       | 5.4.1   | T,p18 |     | p50 |                 |      |      |       |      |      | 6.19.1            |      | 3.6     |      | T1,<br>p2036 |       |        |      |
| 4a       | Standing balance training                                              |       |         | T,p18 |     | p45 | 9.3.1           |      |      |       |      |      |                   |      | 3.6.2.4 |      |              |       | 13.4   |      |

|          |                                                                                    |                   |                 |       |               |        |                    |  |               |       |  |         |                   |        |         |              |              |                    |                |
|----------|------------------------------------------------------------------------------------|-------------------|-----------------|-------|---------------|--------|--------------------|--|---------------|-------|--|---------|-------------------|--------|---------|--------------|--------------|--------------------|----------------|
| 4b       | Sitting balance training                                                           |                   |                 | T,p18 |               | p45    |                    |  | E2.4          |       |  |         |                   |        |         |              |              | 13.4               |                |
| 4c       | Aquatic balance training                                                           |                   |                 |       |               |        | 9.3.1              |  |               |       |  |         |                   |        |         |              |              | 13.4               |                |
| 4d       | Unspecified balance training                                                       |                   |                 |       |               |        | 9.10.5             |  |               |       |  | 6.18.1A |                   |        |         | T1,<br>p2036 |              |                    |                |
| 4e       | Cyclic movements of paretic arm                                                    |                   |                 |       |               |        |                    |  | F7.4          |       |  |         |                   | T2,p47 |         |              |              | 13.6 do<br>not use |                |
| 4f       | Proprioceptive & kinaesthetic training                                             |                   | 5.4.1           |       | p26           | p48    |                    |  | F4.4          | 6.2.3 |  |         |                   |        |         |              |              | 14.1               |                |
| 4g       | Mental rehearsal of upper limb movements                                           | 6.3.5             | 5.4.1           |       | p26,43        | p14,86 | 10.2.8;<br>10.11.9 |  |               | 6.3.4 |  |         | 6.9.1             |        |         |              |              | 13.6.5             |                |
| <b>5</b> | <b>Enhance functional ability</b>                                                  | 1.4.2;<br>6.3;6.4 | 5.4.1;<br>5.5.1 | p13   | p30           | p21    |                    |  | C4.1;<br>E6.4 | 6.4   |  |         | 6.16              |        | 3.6     | T1,<br>p2036 | p2411        | 13.1               |                |
| 5a       | Standing up & sitting down practice                                                |                   | 5.5.1           | T,p17 |               | p45    |                    |  | E4.4          | 6.3.2 |  |         | 6.16              |        | 3.6.2.2 |              |              |                    |                |
| 5b       | Step training / stair climbing                                                     |                   |                 | T,p17 |               | p45    |                    |  |               |       |  |         |                   |        | 3.6.2.2 |              | T1,<br>p2036 |                    | T15-1,<br>p106 |
| 5c       | Walking (including treadmill training)                                             | 6.3.4             | 5.5.3           | T,p17 |               | p41    | 9.10.7;<br>9.10.8  |  |               | 6.3.2 |  |         | 6.16              |        | 3.6.2.2 |              | T1,<br>p2036 | 2411               | 13.5           |
| 5d       | Walking with rhythmic cueing                                                       | 6.3.4             |                 |       |               | p41    | 9.4;<br>9.10.11    |  | E14.4         | 6.3.2 |  |         |                   |        |         |              |              |                    | 13.5           |
| 5e       | Paretic upper limb task-related training                                           | 6.3.5             | 5.4.1           |       | p30,<br>43,50 | p21    | 10.2.5;<br>10.11.5 |  | C4.1          | 6.3.4 |  |         | 6.5.1             |        | 3.6.2.3 |              |              | p2411              | 13.6           |
| 5f       | Bilateral upper limb task-related training                                         | 6.3.5             |                 |       |               | p21    |                    |  |               | 6.3.4 |  |         | 6.5.1             |        |         |              |              |                    | 13.6.6         |
| <b>6</b> | <b>Establish &amp; maintain motivation for regular physical exercise</b>           | 1.4.2             |                 | p11   |               |        |                    |  | 1.4.2;<br>7.8 |       |  |         | 3.11.1;<br>6.13.1 | 12.1   | 3.5.4   |              |              |                    |                |
| 6a       | Address personal beliefs & attitudes                                               |                   |                 |       |               |        |                    |  |               |       |  |         |                   |        | 3.2.4   |              |              |                    |                |
| 6b       | Promote personal goal-setting                                                      |                   |                 |       |               |        |                    |  | 1.7           |       |  |         | 6.13.1            |        | 3.5.2   |              |              |                    |                |
| 6c       | Use motivational interviewing                                                      |                   |                 |       |               |        |                    |  |               |       |  |         | 6.13.1            |        |         |              |              |                    |                |
| 6d       | Promote use of personal reflective diaries                                         |                   |                 |       |               |        |                    |  |               |       |  |         |                   |        | 3.5.4   |              |              |                    |                |
| 6e       | Promote use of personal exercise record including repetitions, load and time spent |                   |                 |       |               |        |                    |  |               |       |  |         |                   |        | 3.5.4   |              |              |                    |                |
| 6f       | Use positive feedback                                                              |                   |                 |       |               |        |                    |  |               |       |  |         | 6.13.1            |        |         |              |              |                    |                |
| 6g       | Emphasise enjoyment                                                                |                   |                 | p12   |               |        |                    |  |               |       |  |         |                   |        | 3.3.6   |              |              |                    |                |

|          |                                                                                                                                      |     |  |              |     |  |  |       |  |  |        |  |                 |      |              |       |  |                        |  |
|----------|--------------------------------------------------------------------------------------------------------------------------------------|-----|--|--------------|-----|--|--|-------|--|--|--------|--|-----------------|------|--------------|-------|--|------------------------|--|
| <b>7</b> | <b>Develop self-management skills for ongoing physical exercise</b>                                                                  |     |  | p20          |     |  |  |       |  |  |        |  |                 |      |              |       |  |                        |  |
| 7a       | Educate for self-monitoring for adverse events                                                                                       |     |  |              |     |  |  |       |  |  |        |  | Box8,<br>p29    |      |              |       |  |                        |  |
| 7b       | Educate about stroke and stroke recovery patterns                                                                                    |     |  |              |     |  |  |       |  |  |        |  |                 |      |              |       |  |                        |  |
| 7c       | Promote active problem-solving                                                                                                       |     |  |              |     |  |  | 1.7   |  |  | 6.13.1 |  |                 |      |              |       |  | 7.8                    |  |
| 7d       | Develop self-efficacy skills                                                                                                         |     |  | p20          |     |  |  |       |  |  | 6.13.1 |  |                 |      |              |       |  |                        |  |
| 7e       | Encourage self-monitoring to set appropriate exercise levels                                                                         |     |  | p10          |     |  |  |       |  |  |        |  | 3.5.4           |      |              |       |  |                        |  |
| 7f       | Encourage independent practice of exercises                                                                                          |     |  | p20          |     |  |  |       |  |  |        |  | 3.3.2           |      |              |       |  |                        |  |
| 7g       | Provide guidance booklets                                                                                                            |     |  |              |     |  |  |       |  |  |        |  | 3.3.2           |      |              |       |  |                        |  |
| <b>8</b> | <b>Personalise programme to individual</b>                                                                                           |     |  |              |     |  |  |       |  |  |        |  | 3.5.2           | p121 | T2,<br>p2039 | p2433 |  | 13.6;<br>15            |  |
| 8a       | Multidimensional pre-assessment conducted by healthcare professional addressing health status, cautions, contraindications and risks |     |  | T1,<br>p5;p7 |     |  |  | 1.2.2 |  |  |        |  | 3.2.2;<br>3.2.3 |      | T2,<br>p2039 | p2410 |  | 1.4                    |  |
| 8b       | Pre-programme assessment by trainers to enable individualisation of programme                                                        |     |  |              | p58 |  |  |       |  |  |        |  | 3.5.1           |      |              |       |  |                        |  |
| 8c       | Adapt programme content to personal situation and goals                                                                              | 6.4 |  | p13;<br>p20  |     |  |  | 1.7   |  |  | 3.11.1 |  | 3.5.2           | p121 |              | p2406 |  | 4.3;7.5;<br>15         |  |
| 8d       | Evaluate programme effects on individual, including satisfaction, functional gains, personal goals, resource use, energy levels      |     |  |              |     |  |  |       |  |  |        |  | 3.7.3           |      |              |       |  | 7.5;<br>App B,<br>p121 |  |
| 8e       | Supplement group classes with individual sessions                                                                                    |     |  |              |     |  |  |       |  |  |        |  | 3.3.2           |      |              |       |  |                        |  |
| 8f       | Sub-divide group classes according to disability levels                                                                              |     |  |              |     |  |  |       |  |  |        |  | 3.3.5           |      |              |       |  |                        |  |
| 8g       | In group classes, conduct functional strengthening exercises together to allow individual monitoring                                 |     |  |              |     |  |  |       |  |  |        |  | T2 p47          |      |              |       |  |                        |  |
| 8h       | Intensity should be adjusted to the individual                                                                                       |     |  | p13          |     |  |  |       |  |  | 5.3.1B |  | 3.6.4.2         |      | T2,<br>p2039 |       |  |                        |  |



|           |                                                                                    |       |  |        |     |     |  |  |                 |      |      |                  |  |         |                        |                        |        |              |      |
|-----------|------------------------------------------------------------------------------------|-------|--|--------|-----|-----|--|--|-----------------|------|------|------------------|--|---------|------------------------|------------------------|--------|--------------|------|
|           | dose                                                                               |       |  |        |     |     |  |  |                 |      |      |                  |  |         |                        |                        |        |              |      |
| <b>10</b> | <b>Provide context facilitating ongoing regular physical exercise</b>              | 1.4.2 |  | p11-12 |     |     |  |  |                 |      |      |                  |  | 3.3.4   |                        |                        |        | 13.7         |      |
| 10a       | Pre-programme contact to discuss any programme barriers                            |       |  | p12    |     |     |  |  |                 |      |      |                  |  | 3.2.1.2 |                        | p2036;<br>T2,<br>p2039 |        |              |      |
| 10b       | Peer/volunteer to accompany to first one or two sessions                           |       |  |        |     |     |  |  |                 |      |      |                  |  | 4.2     |                        |                        |        |              |      |
| 10c       | Minimal use of equipment to facilitate home practice                               |       |  |        |     |     |  |  |                 |      |      |                  |  | 3.6.2.1 |                        |                        |        |              |      |
| 10d       | Promote family / carer involvement                                                 | 6.1.1 |  | T1,p9  | p40 |     |  |  | 6.1.1;<br>8.8   | 13.3 |      | 3.11.1;<br>7.5.1 |  | p114    | p2036;<br>T2,<br>p2039 | p2431                  | 7.6;17 |              |      |
| 10e       | Use peer mentoring                                                                 |       |  |        |     |     |  |  | 8.7             |      |      |                  |  | 3.3.6   |                        |                        |        |              |      |
| 10f       | Use group format for social support                                                |       |  |        |     |     |  |  |                 |      |      |                  |  | 3.3.2   |                        |                        |        |              |      |
| 10g       | Provide opportunities to socialise before and after training                       |       |  |        |     |     |  |  |                 |      |      |                  |  | 3.5.5   |                        |                        |        |              |      |
| 10h       | Use of mixed media including internet-based and tele-training                      |       |  |        |     |     |  |  | 1.2.5           |      |      |                  |  |         |                        |                        |        | 8.1          | 2644 |
| 10i       | Locate at home or centre according to personal circumstances / preferences         | 1.4.1 |  |        | p40 |     |  |  | 7.2.4;7.<br>3.7 |      |      |                  |  | p121    |                        |                        |        | 7.8;<br>13.7 |      |
| 10j       | Locate in own residential environment                                              |       |  |        |     | p21 |  |  | C4.2            |      | p778 |                  |  |         |                        |                        |        |              |      |
| 10k       | Provision of transport where necessary, or locate near good public transport links | 1.4.2 |  |        | p12 |     |  |  |                 |      |      | 7.2.1            |  | 3.1.5   |                        |                        |        |              |      |
| 10l       | Convenient time                                                                    |       |  |        | p12 |     |  |  |                 |      |      |                  |  |         |                        |                        |        |              |      |
| 10m       | Ongoing programme provision                                                        |       |  |        | p12 |     |  |  |                 |      |      |                  |  | 3.3.4   |                        |                        |        |              |      |
| 10n       | Sign-post to other relevant services / facilities                                  | 8.6.1 |  |        |     |     |  |  | 8.7             |      |      | 7.3.1            |  |         |                        |                        |        | 7.8          |      |
| <b>11</b> | <b>Ensure adequate staffing numbers to provide safe and effective training</b>     |       |  |        |     |     |  |  | P101            |      |      |                  |  | 3.3.3   |                        |                        |        |              |      |
| 11a       | Instructor: participant ratio: 1:3 to 1:5                                          |       |  |        | p11 |     |  |  |                 |      |      |                  |  |         |                        |                        |        |              |      |
| 11b       | Instructor: participant ratio: up to 1:8 depending on mix & time since             |       |  |        |     |     |  |  |                 |      |      |                  |  | 3.3.3   |                        |                        |        |              |      |

|           |                                                                                                                                                   |  |     |  |                |  |  |  |  |  |  |      |                             |      |  |       |  |  |  |
|-----------|---------------------------------------------------------------------------------------------------------------------------------------------------|--|-----|--|----------------|--|--|--|--|--|--|------|-----------------------------|------|--|-------|--|--|--|
|           | started exercising                                                                                                                                |  |     |  |                |  |  |  |  |  |  |      |                             |      |  |       |  |  |  |
| 11c       | Supernumerary volunteers or trainees to take part in sessions                                                                                     |  |     |  |                |  |  |  |  |  |  |      | 4.5                         |      |  |       |  |  |  |
| <b>12</b> | <b>Ensure staff are adequately trained for client group</b>                                                                                       |  |     |  |                |  |  |  |  |  |  |      | 3.4                         |      |  |       |  |  |  |
| 12a       | Delivered by instructors with knowledge and training in exercise and stroke                                                                       |  | p21 |  |                |  |  |  |  |  |  | 12.9 | 3.2.5.3                     |      |  |       |  |  |  |
| 12b       | Provide in-service training to instructors                                                                                                        |  |     |  |                |  |  |  |  |  |  |      | 3.2.5.3                     |      |  |       |  |  |  |
| 12c       | Ensure stroke-awareness training of frontline staff in course venue                                                                               |  |     |  |                |  |  |  |  |  |  |      | 4.3                         |      |  |       |  |  |  |
| <b>13</b> | <b>Integrate programme into stroke pathway</b>                                                                                                    |  |     |  | No evid<br>p84 |  |  |  |  |  |  |      | 3.2; 3.3                    |      |  | p2404 |  |  |  |
| 13a       | Develop partnership agreements between stakeholders                                                                                               |  |     |  |                |  |  |  |  |  |  |      | 3.1.3                       |      |  |       |  |  |  |
| 13b       | Referral by healthcare practitioner using clear eligibility criteria                                                                              |  | p5  |  |                |  |  |  |  |  |  |      | 3.2.1.1<br>3.2.2.3<br>3.2.3 |      |  |       |  |  |  |
| 13c       | Encourage referring practitioner to visit programme                                                                                               |  |     |  |                |  |  |  |  |  |  |      | 3.3.1                       |      |  |       |  |  |  |
| 13d       | Established procedures for transferring responsibilities from referrers to trainers                                                               |  |     |  |                |  |  |  |  |  |  |      | 3.2.5                       |      |  |       |  |  |  |
| 13e       | Ongoing communication with (and feedback to) other stakeholders including health care professionals, service commissioners, local stroke networks |  |     |  |                |  |  |  |  |  |  |      | 3.7.5                       |      |  |       |  |  |  |
| 13f       | Referral for other treatments where appropriate                                                                                                   |  |     |  |                |  |  |  |  |  |  |      | 3.3.7;<br>4.4               | p121 |  |       |  |  |  |
| <b>14</b> | <b>Ensure adequate programme governance</b>                                                                                                       |  |     |  |                |  |  |  |  |  |  |      | 3.1                         |      |  |       |  |  |  |
| 14a       | Overseen by management group                                                                                                                      |  |     |  |                |  |  |  |  |  |  |      | 3.1.1                       |      |  |       |  |  |  |
| 14b       | Plan for programme evaluation                                                                                                                     |  | p20 |  |                |  |  |  |  |  |  |      | 3.7                         |      |  |       |  |  |  |
| 14c       | Have procedures for recording and reporting adverse events                                                                                        |  | p20 |  |                |  |  |  |  |  |  |      | 3.7                         |      |  |       |  |  |  |
| 14d       | Have data protection procedures                                                                                                                   |  |     |  |                |  |  |  |  |  |  |      | 3.7                         |      |  |       |  |  |  |

|     |                                  |  |  |       |  |  |  |  |  |  |  |  |  |  |         |  |  |  |  |
|-----|----------------------------------|--|--|-------|--|--|--|--|--|--|--|--|--|--|---------|--|--|--|--|
| 14e | Obtain and check ongoing consent |  |  | p5,11 |  |  |  |  |  |  |  |  |  |  | 3.2.5.4 |  |  |  |  |
|     |                                  |  |  |       |  |  |  |  |  |  |  |  |  |  | 3.2.3.3 |  |  |  |  |

## References

1. National Stroke Foundation: **Clinical Guidelines for Stroke 2010**. Melbourne: National Stroke Foundation; 2010.
2. Canadian Stroke Network: **Canadian Best Practice Recommendations for Stroke Care**. Ottawa: Canadian Stroke Network; 2010.
3. Ontario Stroke Network: **Guidelines for Community Based Exercise Programs for People with Stroke**. Toronto: Ontario Stroke Network; 2010.
4. Consensus Panel on the Management of the Hemiplegic Arm and Hand: **Management of the Post Stroke Arm and Hand: Treatment Recommendations of the 2001 Consensus Panel**. Hamilton, Ontario: Heart and Stroke Foundation of Ontario; 2001.
5. Ottawa Panel: **Ottawa panel evidence-based clinical practice guidelines for post-stroke rehabilitation**. *Top Stroke Rehabil* 2006, **13**(2):1-269.
6. **Evidence-Based Review of Stroke Rehabilitation** [[www.ebrsr.com/](http://www.ebrsr.com/)]
7. Quinn TJ, Paolucci S, Sunnerhagen KS, Sivenius J, Walker MF, Toni D, Lees KR: **Evidence-based stroke rehabilitation: an expanded guidance document from the european stroke organisation (ESO) guidelines for management of ischaemic stroke and transient ischaemic attack 2008**. *J Rehabil Med* 2009, **41**(2):99-111.
8. van Peppen RPS, Kwakkel G, Harmeling-van der Wel BC, Kollen BJ, Hobbelen JSM, Buurke JH: **KNGF Clinical Practice Guideline for physical therapy in patients with stroke. Review of the evidence. [Translation 2008]**. *Nederlands Tijdschrift voor Fysiotherapie* 2004, **114**(5):(suppl).
9. Stroke Foundation of New Zealand and New Zealand Guidelines Group: **Clinical Guidelines for Stroke Management 2010**. Wellington: Stroke Foundation of New Zealand; 2010.
10. Bryer A, Connor M, Haug P, Cheyip B, Staub H, Tipping B, Duim W, Pinkney-Atkinson V: **South African guideline for management of ischaemic stroke and transient ischaemic attack 2010: a guideline from the South African Stroke Society (SASS) and the SASS Writing Committee**. *S Afr Med J* 2010, **100**(11 Pt 2):747-778.
11. Venketasubramanian N, Pwee KH, Chen CP: **Singapore ministry of health clinical practice guidelines on stroke and transient ischemic attacks**. *Int J Stroke* 2011, **6**(3):251-258.
12. RCP: **National Clinical Guideline for Stroke**. 3rd edition. London: Royal College of Physicians; 2008.
13. SIGN: **Management of patients with stroke or TIA: assessment, investigation, immediate management and secondary prevention. A national clinical guideline**. Edinburgh: Scottish Intercollegiate Guidelines Network; 2008.
14. Best C, van Wijck F, Dinan-Young S, Dennis J, Smith M, Frazer H, Donaghy M, Meda G: **Best Practice Guidance for the Development of Exercise after Stroke Services in Community Settings**. University of Edinburgh; 2010.
15. Duncan PW, Zorowitz R, Bates B, Choi JY, Glasberg JJ, Graham GD, Katz RC, Lamberty K, Reker D: **Management of Adult Stroke Rehabilitation Care: a clinical practice guideline**. *Stroke* 2005, **36**(9):e100-143.

16. Gordon NF, Gulanick M, Costa F, Fletcher G, Franklin BA, Roth EJ, Shephard T: **Physical activity and exercise recommendations for stroke survivors: an American Heart Association scientific statement.** *Stroke* 2004, **35**(5):1230-1240.
17. Miller EL, Murray L, Richards L, Zorowitz RD, Bakas T, Clark P, Billinger SA: **Comprehensive overview of nursing and interdisciplinary rehabilitation care of the stroke patient: a scientific statement from the American Heart Association.** *Stroke* 2010, **41**(10):2402-2448.
18. Department of Veteran Affairs: **VA/DOD Clinical practice guideline for the management of stroke rehabilitation.** *J Rehabil Res Dev* 2010, **47**(9):1-43.
19. Schwamm LH, Audebert HJ, Amarenco P, Chumbler NR, Frankel MR, George MG, Gorelick PB, Horton KB, Kaste M, Lackland DT *et al*: **Recommendations for the implementation of telemedicine within stroke systems of care: a policy statement from the American Heart Association.** *Stroke* 2009, **40**(7):2635-2660.
