# Supplementary material for: Synthesising practice guidelines for the development of community-based exercise programmes after stroke
Source: PubMed Central journal article supplement (PMC3851241; doi:10.1186/1748-5908-8-115), 2013-10-01
Supplement: 1748-5908-8-115-S3.pdf [file 1748-5908-8-115-S3.pdf]

### Additional File 3: Proximal objectives, strategies and evidence levels cited in guidelines.

Abbreviations: App – appendix; Cons – expert consensus; GL – guidelines; LT – long term; RCT – randomised control trial; SR – systematic review

Different systems of rating evidence were used in guidelines. See individual guidelines for system employed. Where evidence was not rated by guideline, the type of evidence cited is identified.

Levels of evidence for recommendations in one guideline [7] are provided in a related publication by the same organisation [20]

|          |                                                           | Au  | Ca1    | Ca2       | Ca3  | Ca4 | Ca5         | Eu       | Ne      | NZ  | SA   | Si   | UK1      | UK2  | UK3      | US1  | US2       | US3  | US4  | US5  |
|----------|-----------------------------------------------------------|-----|--------|-----------|------|-----|-------------|----------|---------|-----|------|------|----------|------|----------|------|-----------|------|------|------|
|          | <b>Objective &amp; Strategy</b>                           | [1] | [2]    | [3]       | [4]  | [5] | [6]         | [7] [20] | I[8]    | [9] | [10] | [11] | [12]     | [13] | [14]     | [15] | [16]      | [17] | [18] | [19] |
| <b>1</b> | <b>Increase muscle strength</b>                           | SR  |        | other GLs |      | I   |             |          | 1       | B   |      |      | SRs      |      | SR       | II-2 | other GLs |      | I    |      |
| 1a       | Lower limb strengthening                                  |     |        | other GLs |      | I   | conflicting |          | 1       |     |      |      |          |      | part RCT |      | other GLs | 1    |      |      |
| 1b       | Upper limb strengthening                                  |     | A (LT) | other GLs |      |     | 1a          |          | unclear |     |      |      | SR       |      | part RCT |      | other GLs | 1    | I    |      |
| 1c       | Trunk and core muscle strengthening                       |     |        | other GLs |      |     |             |          |         |     |      |      |          |      | RCT      |      | other GLs |      |      |      |
| <b>2</b> | <b>Increase aerobic endurance</b>                         |     | B (LT) | A         |      |     | 1a          | SR       | 3       | A   |      |      | SR       |      | SR       | II-2 | other GLs |      | I    |      |
| 2a       | Treadmill training                                        |     | B (LT) | other GLs |      | I   | 1a          |          | 1       |     |      |      |          |      |          |      | other GLs |      | I    |      |
| 2b       | Use of static bicycle                                     |     |        | other GLs |      |     | 1a          |          |         |     |      |      |          |      |          |      | other GLs |      |      |      |
| 2c       | Other large muscle group aerobic activity                 |     |        | other GLs |      |     |             |          |         |     |      |      |          |      | part RCT |      |           |      |      |      |
| <b>3</b> | <b>Regain and maintain normal joint range of movement</b> |     | C      |           |      |     |             |          |         |     |      |      | cons; SR |      | part RCT |      | other GLs |      | I    |      |
| 3a       | Lower limb stretching                                     |     | RCT    | other GLs |      |     |             |          |         |     |      |      |          |      | part RCT |      |           |      |      |      |
| 3b       | Upper limb stretching                                     |     | C (LT) | other GLs |      |     | 1a          |          | 2       |     |      |      |          |      |          |      |           |      |      |      |
| 3c       | Trunk stretching                                          |     |        | other GLs |      |     |             |          |         |     |      |      |          |      | part RCT |      |           |      |      |      |
| 3d       | Lower limb movement through range                         |     | C      |           |      |     |             |          |         |     |      |      |          |      | part RCT |      |           |      |      |      |
| 3e       | Upper limb movement through range                         |     | C (LT) |           | cons |     |             |          |         |     |      |      |          |      | part RCT |      |           |      |      |      |
| 3f       | Unspecified stretch/range of movement exercises           |     |        | other GLs | cons |     |             |          |         |     |      |      | cons; SR |      |          |      | other GLs |      |      |      |

|    |                                                                          |    |        |           |      |               |             |  |   |      |  |  |                        |   |                          |  |           |   |     |  |
|----|--------------------------------------------------------------------------|----|--------|-----------|------|---------------|-------------|--|---|------|--|--|------------------------|---|--------------------------|--|-----------|---|-----|--|
| 4  | <b>Enhance sensorimotor functions required for functional activity</b>   |    | A (LT) |           | I    |               |             |  |   |      |  |  | cons                   |   |                          |  | other GLs |   | III |  |
| 4a | Standing balance training                                                |    |        | other GLs |      |               | 1a          |  |   |      |  |  |                        |   | RCT (other condition)    |  |           |   | I   |  |
| 4b | Sitting balance training                                                 |    |        | other GLs |      |               |             |  | 1 |      |  |  |                        |   |                          |  |           |   | I   |  |
| 4c | Aquatic balance training                                                 |    |        |           |      |               | 1b          |  |   |      |  |  |                        |   |                          |  |           |   | I   |  |
| 4d | Unspecified balance training                                             |    |        |           |      |               |             |  |   |      |  |  | SRs                    |   |                          |  | other GLs |   |     |  |
| 4e | Cyclic movements of paretic arm                                          |    |        |           |      |               |             |  | 3 |      |  |  |                        |   | part RCT                 |  |           |   |     |  |
| 4f | Proprioceptive & kinaesthetic training                                   |    | B (LT) |           | cons | II            |             |  | 3 | C    |  |  |                        |   |                          |  |           |   |     |  |
| 4g | Mental rehearsal of upper limb movements                                 | SR | B (LT) |           | cons | multiple RCTs | conflicting |  |   | B    |  |  | SR                     |   |                          |  |           |   | I   |  |
| 5  | <b>Enhance functional ability</b>                                        | B  | A (LT) |           | cons |               |             |  | 1 | B    |  |  |                        |   |                          |  | other GLs | 1 | I   |  |
| 5a | Standing up & sitting down practice                                      |    | RCTs   | other GLs |      |               |             |  | 1 | A    |  |  | SR                     |   | part RCT                 |  |           |   |     |  |
| 5b | Step training / stair climbing                                           |    |        | other GLs |      |               |             |  |   |      |  |  |                        |   | part RCT                 |  | other GLs |   |     |  |
| 5c | Walking (including treadmill training)                                   | SR | B (LT) | other GLs |      |               | 1a          |  | 1 | A    |  |  | SR                     |   | SRs                      |  | other GLs | 1 | I   |  |
| 5d | Walking with rhythmic cueing                                             | SR |        |           |      |               | 1a          |  | 2 | B    |  |  |                        |   |                          |  |           |   | I   |  |
| 5e | Paretic upper limb task-related training                                 | SR | A (LT) |           |      | II            | 1a          |  | 1 | C    |  |  | SR                     |   | part RCT                 |  |           | 1 |     |  |
| 5f | Bilateral upper limb task-related training                               | SR |        |           |      |               | conflicting |  |   | C    |  |  | SR                     |   |                          |  |           | 1 | I   |  |
| 6  | <b>Establish &amp; maintain motivation for regular physical exercise</b> | C  |        | cons      |      |               |             |  |   | C    |  |  | cons                   | 2 | cons                     |  |           |   |     |  |
| 6a | Address personal beliefs & attitudes                                     |    |        |           |      |               |             |  |   |      |  |  |                        |   | RCT: advice insufficient |  |           |   |     |  |
| 6b | Promote personal goal-setting                                            |    |        |           |      |               |             |  |   | cons |  |  | SR not stroke specific |   | cons                     |  |           |   |     |  |
| 6c | Use motivational interviewing                                            |    |        |           |      |               |             |  |   |      |  |  | Part of RCT            |   |                          |  |           |   |     |  |
| 6d | Promote use of personal reflective                                       |    |        |           |      |               |             |  |   |      |  |  |                        |   | cons                     |  |           |   |     |  |

|          |                                                                                                                                      |   |  |           |      |  |  |  |      |      |  |                      |  |      |      |      |     |     |      |
|----------|--------------------------------------------------------------------------------------------------------------------------------------|---|--|-----------|------|--|--|--|------|------|--|----------------------|--|------|------|------|-----|-----|------|
|          | diaries                                                                                                                              |   |  |           |      |  |  |  |      |      |  |                      |  |      |      |      |     |     |      |
| 6e       | Promote use of personal exercise record including repetitions, load and time spent                                                   |   |  |           |      |  |  |  |      |      |  |                      |  | cons |      |      |     |     |      |
| 6f       | Use positive feedback                                                                                                                |   |  |           |      |  |  |  |      |      |  | Part of RCT          |  |      |      |      |     |     |      |
| 6g       | Emphasise enjoyment                                                                                                                  |   |  | cons      |      |  |  |  |      |      |  |                      |  | cons |      |      |     |     |      |
| <b>7</b> | <b>Develop self-management skills for ongoing physical exercise</b>                                                                  |   |  |           |      |  |  |  | cons |      |  |                      |  |      |      |      |     |     |      |
| 7a       | Educate for self-monitoring for adverse events                                                                                       |   |  |           |      |  |  |  |      |      |  |                      |  | App1 |      |      |     |     |      |
| 7b       | Educate about stroke and stroke recovery patterns                                                                                    |   |  |           |      |  |  |  |      |      |  |                      |  |      |      |      |     |     |      |
| 7c       | Promote active problem-solving                                                                                                       |   |  |           |      |  |  |  | cons |      |  | cons                 |  |      |      |      |     |     |      |
| 7d       | Develop self-efficacy skills                                                                                                         |   |  |           |      |  |  |  |      |      |  | cons;<br>part of RCT |  |      |      |      |     |     |      |
| 7e       | Encourage self-monitoring to set appropriate exercise levels                                                                         |   |  |           |      |  |  |  |      |      |  |                      |  | cons |      |      |     |     |      |
| 7f       | Encourage independent practice of exercises                                                                                          |   |  |           |      |  |  |  |      |      |  |                      |  | cons |      |      |     |     |      |
| 7g       | Provide guidance booklets                                                                                                            |   |  |           |      |  |  |  |      |      |  |                      |  | cons |      |      |     |     |      |
| <b>8</b> | <b>Personalise programme to individual</b>                                                                                           |   |  |           |      |  |  |  |      |      |  |                      |  | cons | cons | cons |     |     | I    |
| 8a       | Multidimensional pre-assessment conducted by healthcare professional addressing health status, cautions, contraindications and risks |   |  | cons      |      |  |  |  |      | cons |  |                      |  | cons |      | cons | IIA | III |      |
| 8b       | Pre-programme assessment by trainers to enable individualisation of programme                                                        |   |  |           | cons |  |  |  |      |      |  |                      |  | cons |      |      |     |     |      |
| 8c       | Adapt programme content to personal situation and goals                                                                              | B |  | other GLs |      |  |  |  |      | C    |  |                      |  | cons | cons |      |     |     |      |
| 8d       | Evaluate programme effects on individual, including satisfaction, functional gains, personal goals, resource use, energy levels      |   |  |           |      |  |  |  |      |      |  |                      |  | cons |      |      |     |     | cons |
| 8e       | Supplement group classes with individual sessions                                                                                    |   |  |           |      |  |  |  |      |      |  |                      |  | cons |      |      |     |     |      |
| 8f       | Sub-divide group classes according to disability levels                                                                              |   |  |           |      |  |  |  |      |      |  |                      |  | cons |      |      |     |     |      |
| 8g       | In group classes, conduct functional strengthening exercises together to                                                             |   |  |           |      |  |  |  |      |      |  |                      |  | cons |      |      |     |     |      |

|           |                                                                                              |     |        |           |      |  |  |  |  |  |    |      |      |      |      |           |  |           |      |
|-----------|----------------------------------------------------------------------------------------------|-----|--------|-----------|------|--|--|--|--|--|----|------|------|------|------|-----------|--|-----------|------|
|           | allow individual monitoring                                                                  |     |        |           |      |  |  |  |  |  |    |      |      |      |      |           |  |           |      |
| 8h        | Intensity should be adjusted to the individual                                               |     |        | other GLs |      |  |  |  |  |  |    | cons |      | cons |      | cons      |  |           |      |
| 8i        | pre-programme ECG assessment for exercise level                                              |     |        |           |      |  |  |  |  |  |    |      |      |      |      | cons      |  |           |      |
| 8j        | If maximal heart-rate is unknown, use low intensity but increase training frequency/duration |     |        | other GLs |      |  |  |  |  |  |    |      |      |      |      | cons      |  |           |      |
| 8k        | Shorter, more frequent exercise for frail or deconditioned                                   |     |        | other GLs |      |  |  |  |  |  |    |      |      |      |      |           |  |           |      |
| 8l        | Use of memory aids where necessary                                                           |     |        |           |      |  |  |  |  |  | D  |      | cons |      | cons |           |  |           |      |
| <b>9</b>  | <b>Provide dosage sufficient to establish and maintain benefits</b>                          |     |        |           |      |  |  |  |  |  | II |      | cons |      |      |           |  |           |      |
| 9a        | at least 3 days/week physical exercise                                                       |     |        |           |      |  |  |  |  |  |    |      |      |      |      | SR        |  |           |      |
| 9b        | 20-30 minutes daily moderate intensity physical exercise                                     |     |        |           |      |  |  |  |  |  |    | cons | cons |      | cons |           |  |           |      |
| 9c        | Progression: increase load / required effort over time                                       | SRs |        | other GLs |      |  |  |  |  |  |    |      | cons |      | cons |           |  |           | I    |
| 9d        | Aerobic exercise 20-60 minutes, 3-7 days/week; continuous or accumulated                     |     | B      |           |      |  |  |  |  |  |    |      |      |      |      |           |  | other GLs |      |
| 9e        | Cardiovascular endurance should be large proportion of activity                              |     |        |           |      |  |  |  |  |  |    |      |      |      |      |           |  | other GLs |      |
| 9f        | Strengthening exercises: 4-10 types, 2-3 days/week                                           |     |        | other GLs |      |  |  |  |  |  |    |      |      | cons |      | other GLs |  |           |      |
| 9g        | Flexibility exercises: 2-3 days/week                                                         |     |        | other GLs |      |  |  |  |  |  |    |      |      |      |      | other GLs |  |           |      |
| 9h        | Coordination & balance exercises: 2-3 days/week                                              |     |        | other GLs |      |  |  |  |  |  |    |      |      |      |      | other GLs |  |           |      |
| 9i        | Upper limb exercises 1 hour, 6 days/week                                                     |     | C (LT) |           |      |  |  |  |  |  |    |      |      |      |      |           |  |           |      |
| 9j        | Warm-up: 15-20 minutes including range of movement and large muscle group activity           |     |        |           |      |  |  |  |  |  |    |      |      |      |      | part RCT  |  |           |      |
| 9k        | Aerobic warm-up and cool-down, 3-5 minutes at lower intensity                                |     |        | other GLs |      |  |  |  |  |  |    |      |      |      |      | part RCT  |  |           |      |
| 9l        | Aerobic: up to 10 exercises alternating cardiovascular & local muscle endurance              |     |        |           |      |  |  |  |  |  |    |      |      |      | cons |           |  |           |      |
| 9m        | Include home exercises to increase dose                                                      |     |        | other GLs | cons |  |  |  |  |  |    | cons |      |      | cons |           |  |           |      |
| <b>10</b> | <b>Provide context facilitating ongoing</b>                                                  | RCT |        |           |      |  |  |  |  |  |    |      |      |      | cons |           |  |           | SR-A |

|           |                                                                                           |      |  |              |      |                  |    |    |      |    |  |      |  |                            |      |           |       |   |  |     |
|-----------|-------------------------------------------------------------------------------------------|------|--|--------------|------|------------------|----|----|------|----|--|------|--|----------------------------|------|-----------|-------|---|--|-----|
|           | <b>regular physical exercise</b>                                                          |      |  |              |      |                  |    |    |      |    |  |      |  |                            |      |           |       |   |  |     |
| 10a       | Pre-programme contact to discuss any programme barriers                                   |      |  | other GLs    |      |                  |    |    |      |    |  |      |  | cons                       |      | cons      |       |   |  |     |
| 10b       | Peer/volunteer to accompany to first one or two sessions                                  |      |  |              |      |                  |    |    |      |    |  |      |  | cons                       |      |           |       |   |  |     |
| 10c       | Minimal use of equipment to facilitate home practice                                      |      |  |              |      |                  |    |    |      |    |  |      |  | cons                       |      |           |       |   |  |     |
| 10d       | Promote family / carer involvement                                                        | cons |  | other GLs    | cons |                  |    |    | cons | IV |  | RCTs |  |                            | III  | other GLs | I-IIa | I |  |     |
| 10e       | Use peer mentoring                                                                        |      |  |              |      |                  |    |    | cons |    |  |      |  | RCT (other conditions)     |      |           |       |   |  |     |
| 10f       | Use group format for social support                                                       |      |  |              |      |                  |    |    |      |    |  |      |  | Qualitative                |      |           |       |   |  |     |
| 10g       | Provide opportunities to socialise before and after training                              |      |  |              |      |                  |    |    |      |    |  |      |  | cons                       |      |           |       |   |  |     |
| 10h       | Use of mixed media including internet-based and tele-training                             |      |  |              |      |                  |    |    | C    |    |  |      |  |                            |      |           |       |   |  | IIa |
| 10i       | Locate at home or centre according to personal circumstances / preferences                | B    |  |              | cons |                  | 1a |    |      |    |  |      |  |                            | II-2 |           |       |   |  |     |
| 10j       | Locate in own residential environment                                                     |      |  |              |      | 1 RCT home based |    | 1  |      | IV |  |      |  |                            |      |           |       |   |  |     |
| 10k       | Provision of transport where necessary, or locate near good public transport links        | cons |  |              |      |                  |    |    |      |    |  | cons |  | Qualitative study          |      |           |       |   |  |     |
| 10l       | Convenient time                                                                           |      |  |              |      |                  |    |    |      |    |  |      |  |                            |      |           |       |   |  |     |
| 10m       | Ongoing programme provision                                                               |      |  |              |      |                  |    |    |      |    |  |      |  | RCTs (benefits don't last) |      |           |       |   |  |     |
| 10n       | Sign-post to other relevant services / facilities                                         | cons |  |              |      |                  |    |    | cons |    |  | cons |  |                            |      |           |       |   |  |     |
| <b>11</b> | <b>Ensure adequate staffing numbers to provide safe and effective training</b>            |      |  |              |      |                  |    | II |      |    |  |      |  | cons                       |      |           |       |   |  |     |
| 11a       | Instructor: participant ratio: 1:3 to 1:5                                                 |      |  | Seen in RCTs |      |                  |    |    |      |    |  |      |  |                            |      |           |       |   |  |     |
| 11b       | Instructor: participant ratio: up to 1:8 depending on mix & time since started exercising |      |  |              |      |                  |    |    |      |    |  |      |  | cons                       |      |           |       |   |  |     |



## References

1. National Stroke Foundation: **Clinical Guidelines for Stroke 2010**. Melbourne: National Stroke Foundation; 2010.
2. Canadian Stroke Network: **Canadian Best Practice Recommendations for Stroke Care**. Ottawa: Canadian Stroke Network; 2010.
3. Ontario Stroke Network: **Guidelines for Community Based Exercise Programs for People with Stroke**. Toronto: Ontario Stroke Network; 2010.
4. Consensus Panel on the Management of the Hemiplegic Arm and Hand: **Management of the Post Stroke Arm and Hand: Treatment Recommendations of the 2001 Consensus Panel**. Hamilton, Ontario: Heart and Stroke Foundation of Ontario; 2001.
5. Ottawa Panel: **Ottawa panel evidence-based clinical practice guidelines for post-stroke rehabilitation**. *Top Stroke Rehabil* 2006, **13**(2):1-269.
6. **Evidence-Based Review of Stroke Rehabilitation** [[www.ebrsr.com/](http://www.ebrsr.com/)]
7. Quinn TJ, Paolucci S, Sunnerhagen KS, Sivenius J, Walker MF, Toni D, Lees KR: **Evidence-based stroke rehabilitation: an expanded guidance document from the european stroke organisation (ESO) guidelines for management of ischaemic stroke and transient ischaemic attack 2008**. *J Rehabil Med* 2009, **41**(2):99-111.
8. van Peppen RPS, Kwakkel G, Harmeling-van der Wel BC, Kollen BJ, Hobbelen JSM, Buurke JH: **KNGF Clinical Practice Guideline for physical therapy in patients with stroke. Review of the evidence. [Translation 2008]**. *Nederlands Tijdschrift voor Fysiotherapie* 2004, **114**(5):(suppl).
9. Stroke Foundation of New Zealand and New Zealand Guidelines Group: **Clinical Guidelines for Stroke Management 2010**. Wellington: Stroke Foundation of New Zealand; 2010.
10. Bryer A, Connor M, Haug P, Cheyip B, Staub H, Tipping B, Duim W, Pinkney-Atkinson V: **South African guideline for management of ischaemic stroke and transient ischaemic attack 2010: a guideline from the South African Stroke Society (SASS) and the SASS Writing Committee**. *S Afr Med J* 2010, **100**(11 Pt 2):747-778.
11. Venketasubramanian N, Pwee KH, Chen CP: **Singapore ministry of health clinical practice guidelines on stroke and transient ischemic attacks**. *Int J Stroke* 2011, **6**(3):251-258.
12. RCP: **National Clinical Guideline for Stroke**. 3rd edition. London: Royal College of Physicians; 2008.
13. SIGN: **Management of patients with stroke or TIA: assessment, investigation, immediate management and secondary prevention. A national clinical guideline**. Edinburgh: Scottish Intercollegiate Guidelines Network; 2008.
14. Best C, van Wijck F, Dinan-Young S, Dennis J, Smith M, Frazer H, Donaghy M, Meda G: **Best Practice Guidance for the Development of Exercise after Stroke Services in Community Settings**. University of Edinburgh; 2010.
15. Duncan PW, Zorowitz R, Bates B, Choi JY, Glasberg JJ, Graham GD, Katz RC, Lamberty K, Reker D: **Management of Adult Stroke Rehabilitation Care: a clinical practice guideline**. *Stroke* 2005, **36**(9):e100-143.
16. Gordon NF, Gulanick M, Costa F, Fletcher G, Franklin BA, Roth EJ, Shephard T: **Physical activity and exercise recommendations for stroke survivors: an American Heart Association scientific statement**. *Stroke* 2004, **35**(5):1230-1240.
17. Miller EL, Murray L, Richards L, Zorowitz RD, Bakas T, Clark P, Billinger SA: **Comprehensive overview of nursing and interdisciplinary rehabilitation care of the stroke patient: a scientific statement from the American Heart Association**. *Stroke* 2010, **41**(10):2402-2448.
18. Department of Veteran Affairs: **VA/DOD Clinical practice guideline for the management of stroke rehabilitation**. *J Rehabil Res Dev* 2010, **47**(9):1-43.

19. Schwamm LH, Audebert HJ, Amarenco P, Chumbler NR, Frankel MR, George MG, Gorelick PB, Horton KB, Kaste M, Lackland DT *et al*: **Recommendations for the implementation of telemedicine within stroke systems of care: a policy statement from the American Heart Association**. *Stroke* 2009, **40**(7):2635-2660.
20. European Stroke Organisation: **Guidelines for management of ischaemic stroke and transient ischaemic attack 2008**. *Cerebrovasc Dis* 2008, **25**(5):457-507.
